# Supplementary material
Source: PubMed Central journal article supplement (PMC7966597)
Supplement: 3854_table.pdf [file 3854_table.pdf]

**On-line Table: Readability scales and their formulas**

| Scale                       | Description                                                                                                | Formula                                                                                                                                                                                                                                                                                                                                 |
|-----------------------------|------------------------------------------------------------------------------------------------------------|-----------------------------------------------------------------------------------------------------------------------------------------------------------------------------------------------------------------------------------------------------------------------------------------------------------------------------------------|
| Flesch Reading Ease         | Average number of syllables (B), average number of words per sentence (W), average number of sentences (S) | $FRE = 206.835 - [84.6 \times (B/W)] - [(1.015 \times W/S)]$                                                                                                                                                                                                                                                                            |
| Coleman-Liau Index          | Average number of letters per 100 words (L) and average number of sentences per 100 words (S)              | $CLI = (0.0588 \times L) - (0.296 \times S) - 15.8$                                                                                                                                                                                                                                                                                     |
| Flesch-Kincaid Grade Level  | Average number of syllables per word (SY) and average number of words per sentence (W)                     | $FKGL = (0.39 \times W) + (11.8 \times SY) - 15.59$                                                                                                                                                                                                                                                                                     |
| FORCAST Formula             | Number of single-syllable words in a 150-word sample (SS)                                                  | FORCAST Formula = $20 - (SS/10)$                                                                                                                                                                                                                                                                                                        |
| Fry Graph                   | Average number of sentences and syllables per 100 words                                                    | <ol style="list-style-type: none"> <li>1) Extract a 100-word passage from the selection</li> <li>2) Count the number of sentences in each passage (count a half sentence as 0.5)</li> <li>3) Count the number of syllables in each passage</li> <li>4) Find the point on the chart (3 samples recommended for best results)</li> </ol>  |
| Gunning Fog Index           | Number of sentences (S), number of words (W), number of words with $\geq 3$ syllables (C)                  | $GFI = 0.4 \times (W/S + [(C/W) \times 100])$                                                                                                                                                                                                                                                                                           |
| New Dale Chall              | Average number of words per sentence (AW) and percentage of unfamiliar words (%U)                          | $NDC = (0.1579 \times \%U) + (0.0496 \times AW)$                                                                                                                                                                                                                                                                                        |
| New Fog Count               | Number of complex words (C), number of easy words (E), number of sentences (S)                             | $NFC = [(E + (3 \times C))/S] - 3]/2$                                                                                                                                                                                                                                                                                                   |
| Raygor Readability Estimate | Average number of sentences and long ( $\geq 6$ characters) words per 100 words                            | <ol style="list-style-type: none"> <li>1) Select a 100-word passage from the selection</li> <li>2) Count the number of sentences, estimated to the nearest tenth</li> <li>3) Count the number of words that are <math>\geq 6</math> letters</li> <li>4) Find the point on the chart (3 samples recommended for best results)</li> </ol> |
| SMOG Readability Formula    | Average number of words with $\geq 3$ syllables (C) and average number of sentences (S)                    | $SMOG = 1.043 \times \sqrt{[(C \times (30/S)) + 3.129]}$                                                                                                                                                                                                                                                                                |
